# Supplementary material for: Virtual Screening and ADMET Prediction to Uncover the Potency of Flavonoids from Genus Erythrina as Antibacterial Agent through Inhibition of Bacterial ATPase DNA Gyrase B
Source: MDPI journal article supplement (doi:10.3390/molecules28248010), 2023-12-08
Supplement: s1 [file s1]

## Supplementary Material

**Table S1.** Binding affinity.

| Compound Code | Compounds                                                                                                           | Binding Affinity |
|---------------|---------------------------------------------------------------------------------------------------------------------|------------------|
|               | Co-crystal ligand                                                                                                   | -8.853           |
|               | ATP                                                                                                                 | -7.498           |
| 14            | Apigenin-7-O-rhamnosyl-6-C-glucoside                                                                                | -9.615           |
| 20            | Kaempferol-3-O-(2''-O-β-D-glucopyranosyl-6''-O-α-L-rhamnopyranosyl-β-D-glucopyranoside)                             | -9.599           |
| 74            | Lonchocarpol C                                                                                                      | -9.489           |
| 131           | Eryzerin C                                                                                                          | -9.411           |
| 70            | 2(S)-5,7-Dihydroxy-[(5'',6'':3',4')-(2'',2''-dimethylpyrano)-(5''',6''':5',6')-(2''',2'''- dimethylpyrano)flavanone | -9.373           |
| 64            | Sigmoidin E                                                                                                         | -9.352           |
| 94            | (2S)-5,7-Dihydroxy-5'-prenyl-2''-(4''-hydroxyisopropyl)-dihydrofurano[1'',3'':3',4'] flavanone                      | -9.287           |
| 210           | Isolupabigenin                                                                                                      | -9.244           |
| 88            | 2(S)-5,7-Dihydroxy-5'-prenyl- [2'',2''-(3''-hydroxy)- dimethylpyrano]-(5'',6'':3',4') flavanone                     | -9.228           |
| 7             | Neocyclomorusin                                                                                                     | -9.208           |
| 79            | Fuscaflavanones B                                                                                                   | -9.184           |
| 96            | (2S)-5,7,5'-Trihydroxy-2''-(4''- hydroxyisopropyl)-dihydrofurano [1'',3'':3',4']flavanone                           | -9.149           |
| 52            | Ispedezaflavanone B (Euchrestaflavanone A)                                                                          | -9.124           |
| 130           | Eryzerin D                                                                                                          | -9.124           |
| 16            | Vicenin-2                                                                                                           | -9.097           |
| 178           | 5,3'-Dihydroxy-4'-methoxy-5'-γ,γ-dimethylallyl-2'',2''-dimethylpyrano[5,6:6,7] isoflavanone                         | -9.096           |
| 98            | (2S)-5,7,5'-Trihydroxy-2''-(4''- hydroxyisopropyl)-3''-hydroxy-dihydrofurano[1'',3'':3',4'] flavanone               | -9.094           |
| 75            | Lonchocarpol D                                                                                                      | -9.068           |
| 222           | Vogelin G                                                                                                           | -9.061           |
| 223           | Ficuisoflavone                                                                                                      | -9.048           |
| 78            | Fuscaflavanones A2                                                                                                  | -9.043           |
| 201           | Corylin                                                                                                             | -8.971           |
| 40            | Erythribyssin G                                                                                                     | -8.966           |
| 137           | Erylivingstone K                                                                                                    | -8.965           |
| 193           | Erysubin F                                                                                                          | -8.951           |
| 138           | 2',7-Dihydroxy-3' -(3-methylbut-2- enyl)-2''',2'''-dimethylpyrano [5'',6'':4',5']isoflavan                          | -8.946           |
| 73            | Lonchocarpol A (Senegalensein)                                                                                      | -8.941           |
| 99            | (2S)-5,7,5'-Trihydroxy-6'-prenyl-2''-(4''-hydroxyisopropyl)-3''-hydroxy-dihydrofurano[1'',3'':4',5'] flavanone      | -8.941           |
| 90            | 2(S)-5,7-Dihydroxy- [2'',2''-(3'',4''-dihydroxy)- dimethylpyrano]-(5'',6'':3',4') flavanone                         | -8.933           |
| 174           | Erythraddison IV                                                                                                    | -8.922           |
| 24            | Glabrol                                                                                                             | -8.914           |
| 77            | Fuscaflavanones A1                                                                                                  | -8.887           |

|     |                                                                                                     |        |
|-----|-----------------------------------------------------------------------------------------------------|--------|
| 91  | 2(S)-5,7-Dihydroxy-5'-prenyl [2'',2''-(3'',4''-dihydroxy)-dimethylpyrano]-(5'',6'':3',4') flavanone | -8.863 |
| 200 | Erylatissin B                                                                                       | -8.861 |
| 51  | 6-Prenylabyssinone V                                                                                | -8.845 |
| 241 | Parvisoflavone B                                                                                    | -8.844 |
| 76  | Lupinifolin                                                                                         | -8.841 |
| 72  | Citflavanone                                                                                        | -8.838 |
| 181 | 5,4-Dihydroxy-2-methoxy-8-(3,3- dimethylallyl)-2,2-dimethylpyrano [5,6:6,7]isoflavanone             | -8.833 |
| 243 | Auriculasin                                                                                         | -8.821 |
| 244 | Auriculatin                                                                                         | -8.814 |
| 123 | Abyssinone B                                                                                        | -8.802 |
| 180 | 2,3-Dihydroauriculatin                                                                              | -8.775 |
| 49  | Abyssinone V                                                                                        | -8.774 |
| 66  | Sigmoidin G                                                                                         | -8.762 |
| 34  | Abyssinone-IV-4'-O-methyl ether                                                                     | -8.756 |
| 236 | Alpinumisoflavone                                                                                   | -8.722 |
| 260 | Erymildbraedin B                                                                                    | -8.718 |
| 251 | Derrone                                                                                             | -8.716 |
| 182 | Glyasperin F                                                                                        | -8.711 |
| 254 | Erysubin A                                                                                          | -8.704 |
| 257 | 5,7,4'-Trihydroxy-6-(3'',3''-dimethylallyloxiranylmethyl) isoflavone                                | -8.691 |
| 50  | Abyssinone-V-4'-O-methyl ether                                                                      | -8.689 |
| 1   | 6-Prenylapigenin                                                                                    | -8.688 |
| 136 | Erylivingstone J                                                                                    | -8.685 |
| 41  | Erythribyssin I                                                                                     | -8.684 |
| 160 | Bidwillon B                                                                                         | -8.678 |
| 85  | Abyssinoflavanone VI                                                                                | -8.674 |
| 128 | Eryzerin C                                                                                          | -8.674 |
| 140 | Erypogin B (Burttinol B)                                                                            | -8.674 |
| 242 | Warangalone (Scandenone)                                                                            | -8.658 |
| 67  | 2(S)-5,5',7-Trihydroxy-2'-prenyl- (2'',2''-dimethylpyrano)-(5'',6'':3',4')flavanone                 | -8.655 |
| 155 | 5-Deoxyglasperin F                                                                                  | -8.649 |
| 82  | Abyssinin III                                                                                       | -8.643 |
| 129 | 4',7-Dihydroxy-2'-methoxy-3'-(3- methylbut-2-enyl)isoflavan                                         | -8.633 |
| 15  | Vicenin-1                                                                                           | -8.628 |
| 124 | Abyssinone C                                                                                        | -8.624 |
| 12  | Isovitexin                                                                                          | -8.613 |
| 118 | Abyssinone-VI-4-O-methyl ether                                                                      | -8.611 |
| 63  | Sigmoidin D                                                                                         | -8.608 |
| 59  | Sigmoidin B                                                                                         | -8.594 |
| 84  | Abyssinoflavanone V                                                                                 | -8.588 |
| 246 | Robustone                                                                                           | -8.564 |
| 220 | Vogelin E                                                                                           | -8.556 |
| 259 | 5,4-Dihydroxy-8-(3,3- dimethylallyl)-2-methoxyisopropylfurano[4,5:6,7] isoflavone                   | -8.555 |
| 202 | Bidwillon C                                                                                         | -8.544 |
| 172 | 2,3-Dihydro-2'-hydroxyosajin                                                                        | -8.535 |
| 60  | 3'-O-Methylsigmoidin                                                                                | -8.533 |

|     |                                                                                                         |        |
|-----|---------------------------------------------------------------------------------------------------------|--------|
| 36  | 5-Deoxyabyssinin II                                                                                     | -8.532 |
| 218 | 5-Hydroxy-3''-hydroxy-2'',2''- dimethyldihydropyrano [5'',6'':3',4']isoflavone                          | -8.529 |
| 145 | Eryvarin I                                                                                              | -8.525 |
| 57  | Erycaffra F                                                                                             | -8.512 |
| 23  | Isobavachin                                                                                             | -8.511 |
| 166 | Eryvarin N                                                                                              | -8.508 |
| 168 | Eryzerin B                                                                                              | -8.501 |
| 100 | Addisoniaflavanone I                                                                                    | -8.499 |
| 80  | Abyssinin I                                                                                             | -8.498 |
| 93  | 2(S)-5,5',7-Trihydroxy-[2'',2''-(4''- chromanone)- dimethylpyrano]-(5'',6'':3',4') flavanone            | -8.495 |
| 255 | Erysubin B                                                                                              | -8.494 |
| 95  | (2S)-5,7-Dihydroxy-5'-methoxy-2''- (4''-hydroxyisopropyl)- dihydrofurano[1'',3'':3',4'] flavanone       | -8.487 |
| 179 | 5,3'-Dihydroxy-2'',2''-dimethylpyrano-[5,6:6,7]-2''',2'''- dimethylpyrano[5,6:5,4] isoflavanone         | -8.482 |
| 55  | Burttinone                                                                                              | -8.463 |
| 247 | M-Wi-2                                                                                                  | -8.462 |
| 225 | 3'-(3-Methylbut-2-enyl) biochanin                                                                       | -8.461 |
| 86  | Abyssinoflavanone VII                                                                                   | -8.453 |
| 139 | Erypogin A (Burttinol C)                                                                                | -8.435 |
| 4   | Vogelin J                                                                                               | -8.433 |
| 205 | 6-Hydroxygenistein                                                                                      | -8.433 |
| 33  | Abyssinone IV                                                                                           | -8.431 |
| 62  | Sigmoidin C                                                                                             | -8.419 |
| 30  | Abyssinone I                                                                                            | -8.413 |
| 135 | 2'-Methoxyphaseollinisoflavan                                                                           | -8.411 |
| 117 | Abyssinone VI                                                                                           | -8.408 |
| 28  | 5'-(2-Hydroxy-3-methylbut-3-enyl) abyssinone II                                                         | -8.401 |
| 159 | Sigmoidin J                                                                                             | -8.393 |
| 219 | 4'-Hydroxy-5,7- dimethoxyisoflavone                                                                     | -8.392 |
| 250 | Osajin                                                                                                  | -8.376 |
| 47  | 3'-Prenylnaringenin                                                                                     | -8.368 |
| 109 | Erylivingstone F                                                                                        | -8.366 |
| 92  | 2(S)-5,5',7-Dihydroxy-6'-prenyl [2'',2''-(3'',4''-dihydroxy)- dimethylpyrano]-(5'',6'':3',4') flavanone | -8.341 |
| 167 | Eryvarin V                                                                                              | -8.337 |
| 249 | 4',7-Dihydroxy-2'',2''- dimethylpyrano[5'',6'':5,6] isoflavone                                          | -8.331 |
| 89  | 2(S)-5,7-Dihydroxy-5'-methoxy- [2'',2''-(3''-hydroxy)- dimethylpyrano]-(5'',6'':3',4') flavanone        | -8.329 |
| 39  | 2(S)-5',7-Dihydroxy-[2'',2''-(3''- hydroxy)-dimethylpyrano]-(5'',6'':3',4')flavanone                    | -8.327 |
| 18  | Diosmetin-6-C-glucoside                                                                                 | -8.326 |
| 256 | 5,4'-Dihydroxy-2'-methoxy-8-(3,3- dimethylallyl)-2'',2''- dimethylpyrano[5,6:6,7]isoflavone             | -8.315 |
| 173 | Erythraddison III                                                                                       | -8.311 |
| 6   | Atalantoflavone (Limonianin)                                                                            | -8.309 |
| 148 | Eriotrichin B (Bidwillon A)                                                                             | -8.309 |
| 221 | Vogelin F                                                                                               | -8.286 |

|     |                                                                                              |        |
|-----|----------------------------------------------------------------------------------------------|--------|
| 209 | Isowighteone (3'-Isoprenylgenistein)                                                         | -8.283 |
| 203 | Erythrinin A                                                                                 | -8.266 |
| 68  | 2(S)-5,5',7-Trihydroxy- [2''(5''- hydroxy)-methylpyrano]-<br>(5'',6'':3',4')flavanone        | -8.258 |
| 37  | 7-Hydroxy-4'-methoxy-3'-(3- methylbut-2-enyl)flavanone                                       | -8.256 |
| 54  | Burttinonedehydrate                                                                          | -8.255 |
| 69  | 2 (S)-5,7-Dihydroxy-3'-methoxy- [2''(5''-hydroxy)-methylpyrano]-<br>(5'',6'':3',4')flavanone | -8.254 |
| 61  | 4'-O-Methylsigmoidin                                                                         | -8.245 |
| 248 | Erythgianin A                                                                                | -8.243 |
| 58  | Sigmoidin A                                                                                  | -8.242 |
| 152 | Orientanol D                                                                                 | -8.238 |
| 42  | Erylivingstone I                                                                             | -8.235 |
| 233 | 5,4'-Dimethoxy-3'-prenylbiochanin A                                                          | -8.216 |
| 153 | Orientanol F                                                                                 | -8.207 |
| 208 | Lupiwighteone (8-Prenylgenistein)                                                            | -8.201 |
| 45  | Eriodictyol                                                                                  | -8.197 |
| 224 | 5'-Prenylpratensein                                                                          | -8.186 |
| 232 | Schliebenone C                                                                               | -8.181 |
| 253 | Isochandalon                                                                                 | -8.175 |
| 48  | Licoflavanone-4'-O-methyl ether                                                              | -8.153 |
| 65  | Sigmoidin F                                                                                  | -8.153 |
| 102 | Addisoniaflavanone III                                                                       | -8.144 |
| 211 | 6,8-Diprenylorobol                                                                           | -8.139 |
| 56  | Erycaffra D                                                                                  | -8.138 |
| 191 | 8-Prenyldaidzein                                                                             | -8.136 |
| 157 | Sigmoidin H                                                                                  | -8.134 |
| 163 | Eryzerin A                                                                                   | -8.132 |
| 122 | Abyssinone A                                                                                 | -8.115 |
| 2   | Luteolin                                                                                     | -8.113 |
| 217 | 5,4'-Dihydroxy-7-methoxy-3'-(3- methyl-2-hydroxybuten-3-yl)<br>isoflavone                    | -8.106 |
| 154 | 5,2',4'-Trihydroxy-6-prenyl-2''',2'''dimethyldihydropyrano[5''',6''']<br>isoflavanone        | -8.088 |
| 27  | 7,3',4'-Trihydroxyflavanone                                                                  | -8.086 |
| 207 | Wighteone (Erythrinin B) (6-Prenylgenistein)                                                 | -8.086 |
| 164 | Eryvarin B                                                                                   | -8.085 |
| 185 | Erypogin C (Vogelin B)                                                                       | -8.075 |
| 141 | Burttinol A                                                                                  | -8.072 |
| 25  | Erythribyssin K                                                                              | -8.069 |
| 46  | Homohesperetin                                                                               | -8.068 |
| 176 | 5,7,3'-Trihydroxy-4'-methoxy-6,5'di(γ,γ-dimethylallyl)isoflavanone                           | -8.066 |
| 11  | Vitexin                                                                                      | -8.056 |
| 106 | Erylivingstone C                                                                             | -8.046 |
| 184 | Vogelin A (Lysisteisoflavanone)                                                              | -8.043 |
| 175 | 2,3-Dihydropratensein                                                                        | -8.042 |
| 35  | Erylatissin C                                                                                | -8.028 |
| 198 | 5-Deoxy-3'-prenylbiochanin A                                                                 | -8.022 |
| 234 | Laburnetin                                                                                   | -8.022 |
| 183 | Licoisoflavanones                                                                            | -8.015 |

|     |                                                                     |        |
|-----|---------------------------------------------------------------------|--------|
| 116 | Licoagrochalcone A                                                  | -8.006 |
| 237 | 4-O-Methylalpinumisoflavone                                         | -8.006 |
| 245 | Warangalone 4'-O-methyl ether                                       | -8.004 |
| 107 | Erylivingstone D                                                    | -8.003 |
| 87  | 2(S)-5'-(2-Hydroxy-3-methylbut-3-enyl)licoflavone-4'-O-methyl ether | -7.997 |
| 151 | Erythribyssin J                                                     | -7.982 |
| 206 | 6,8-Diprenylgenistein                                               | -7.962 |
| 171 | Orientanol E                                                        | -7.959 |
| 105 | Erylivingstone B                                                    | -7.955 |
| 104 | Erylivingstone A                                                    | -7.953 |
| 194 | Eryvarin S                                                          | -7.943 |
| 158 | Sigmoidin I                                                         | -7.937 |
| 108 | Erylivingstone E                                                    | -7.896 |
| 26  | Liquiritigenin-5'-O-methyl ether                                    | -7.893 |
| 43  | Naringenin                                                          | -7.889 |
| 188 | Vogelin D                                                           | -7.884 |
| 192 | Neobavaisoflavone                                                   | -7.882 |
| 195 | Erythraddison II                                                    | -7.881 |
| 186 | Erypogin D                                                          | -7.879 |
| 132 | Eryvarin T                                                          | -7.877 |
| 161 | 2,3-Dihydro-2'-hydroxyneobavaisoflavanone                           | -7.855 |
| 196 | 2',7-Dihydroxy-4'-methoxy-5'-(3-methylbut-2-enyl)isoflavone         | -7.833 |
| 199 | Erylatissin A                                                       | -7.833 |
| 149 | Prostratol C                                                        | -7.816 |
| 214 | 5,2',4'-Trihydroxy-7-methoxy-5'-(3-methylbuten-2-yl)isoflavone      | -7.798 |
| 133 | Erythribidin A                                                      | -7.795 |
| 44  | Isosakuranetin                                                      | -7.791 |
| 143 | Bidwillol A                                                         | -7.791 |
| 22  | Liquiritigenin                                                      | -7.776 |
| 111 | Erylivingstone H                                                    | -7.767 |
| 142 | 7,4'-Dihydroxy-2',5'-dimethoxyisoflav-3-ene                         | -7.737 |
| 258 | Erymildbraedin A                                                    | -7.737 |
| 110 | Erylivingstone G                                                    | -7.722 |
| 239 | Indicanine C                                                        | -7.679 |
| 156 | 5-Deoxylicoisoflavanones                                            | -7.676 |
| 150 | Erythribyssin E                                                     | -7.659 |
| 230 | Schliebenone A                                                      | -7.656 |
| 147 | Vestitone                                                           | -7.652 |
| 228 | 5'-Formylpratensein                                                 | -7.638 |
| 144 | Eryvarin H                                                          | -7.615 |
| 146 | Eryvarin O                                                          | -7.598 |
| 229 | 5,7-Dihydroxy-4'-methoxy-3'-(2,3-dihydroxy-3-methylbutyl)isoflavone | -7.593 |
| 216 | 3'-Formyl-5,4'-dihydroxy-7-methoxyisoflavone                        | -7.588 |
| 114 | Isobavachalcone                                                     | -7.578 |
| 226 | Piscerythrinetin                                                    | -7.561 |
| 5   | Carpachromene                                                       | -7.546 |
| 190 | Daidzein                                                            | -7.519 |
| 19  | 3,7,4'-Trihydroxyflavone                                            | -7.516 |
| 227 | 2'-Hydroxy-5'-methoxybiochanin A                                    | -7.506 |

|     |                                                                                                            |        |
|-----|------------------------------------------------------------------------------------------------------------|--------|
| 120 | 3-O-Methylbutein                                                                                           | -7.495 |
| 215 | Cajanin                                                                                                    | -7.483 |
| 213 | 5,4'-Dihydroxy-7-methoxy-3'-(3-methylbuten-2-yl)isoflavone                                                 | -7.481 |
| 126 | 2,4,4'-Trihydroxychalcone                                                                                  | -7.471 |
| 177 | (R)-saclenone                                                                                              | -7.468 |
| 204 | Genistein                                                                                                  | -7.413 |
| 115 | Isoliquiritigenin                                                                                          | -7.335 |
| 238 | 5,4'-Dimethoxy alpinumisoflavone                                                                           | -7.319 |
| 169 | Erycaffra E                                                                                                | -7.315 |
| 240 | Indicanine E                                                                                               | -7.221 |
| 3   | Vogelin C                                                                                                  | -7.094 |
| 8   | Salvigenin                                                                                                 | -7.093 |
| 119 | Butein                                                                                                     | -7.051 |
| 10  | Sinenetin                                                                                                  | -7.023 |
| 9   | Tetramethylisoscuteallarein                                                                                | -6.966 |
| 112 | Hamiltone A                                                                                                | -6.907 |
| 170 | 5,7-Dihydroxy-2',4',5'-trimethoxyisoflavanone                                                              | -6.902 |
| 113 | 6-Methoxyhamiltone A                                                                                       | -6.851 |
| 127 | 6'-Hydroxy-2',3',4',4'-tetramethoxychalcone                                                                | -6.838 |
| 21  | Kaempferol-3-O- $\beta$ -D-glucopyranosyl- (1 $\rightarrow$ 2)- $\beta$ -D-glucopyranoside                 | -5.542 |
| 13  | Isovitexin-2''- $\beta$ -D-glucopyranoside                                                                 | -1.257 |
| 287 | 4'-Hydroxyisoflavone-7-O- $\alpha$ -L-rhamnosyl/ (1 $\rightarrow$ 6)- $\beta$ -D-glucopyranoside           | -10.36 |
| 339 | Erypogin J                                                                                                 | -10.15 |
| 354 | Sigmoidin K                                                                                                | -9.941 |
| 341 | Erysubin E                                                                                                 | -9.825 |
| 333 | Demethylerythragallin A                                                                                    | -9.79  |
| 345 | Erycristagallin                                                                                            | -9.771 |
| 325 | Erythribyssin L                                                                                            | -9.469 |
| 351 | Erythribyssin O                                                                                            | -9.377 |
| 355 | Isosojagol                                                                                                 | -9.275 |
| 97  | (2S)-5,7-Dihydroxy-5'-prenyl-2''-(4''-hydroxyisopropyl)-3''-hydroxy-dihydrofurano [1'',3'':3',4']flavanone | -9.2   |
| 334 | Erythragallin B                                                                                            | -9.126 |
| 32  | Abyssinone III                                                                                             | -9.12  |
| 264 | Erysenegalensein F                                                                                         | -9.061 |
| 347 | Erypogin H                                                                                                 | -9.058 |
| 83  | Abyssinoflavanone IV                                                                                       | -9.05  |
| 252 | Isoderrone                                                                                                 | -9.04  |
| 286 | 4'-Hydroxyisoflavone-7-O- $\beta$ -D-glucopyranoside                                                       | -9.021 |
| 332 | Erythragallin A                                                                                            | -8.937 |
| 134 | Phaseollinisoflavan                                                                                        | -8.89  |
| 278 | Vogelin I                                                                                                  | -8.888 |
| 267 | Erysenegalensein L                                                                                         | -8.865 |
| 371 | Erythribyssin F                                                                                            | -8.824 |
| 360 | Erysenegalensein J                                                                                         | -8.812 |
| 350 | Eryvarin W                                                                                                 | -8.756 |
| 344 | Hydroxycristacarpone                                                                                       | -8.754 |
| 53  | 5-Hydroxysophoranone                                                                                       | -8.74  |

|     |                                                                                      |        |
|-----|--------------------------------------------------------------------------------------|--------|
| 38  | 2(S)-5',7-Dihydroxy-[2'',2''-(3''- hydroxy)-dimethylpyrano]-(5'',6'':3',4')flavanone | -8.71  |
| 349 | Eryvarin E                                                                           | -8.708 |
| 319 | Orientanol C                                                                         | -8.706 |
| 275 | Hydroxyerythrinin C                                                                  | -8.701 |
| 268 | Erysenegalensein M                                                                   | -8.7   |
| 366 | Eryvarin Q                                                                           | -8.689 |
| 189 | Auriculatin 4'-O-glucoside                                                           | -8.66  |
| 17  | Isoorientin                                                                          | -8.65  |
| 308 | Erybraedin B                                                                         | -8.649 |
| 279 | Eriotriochin                                                                         | -8.63  |
| 294 | 1-Methoxyerythrabyssin II                                                            | -8.607 |
| 314 | Erylysin A                                                                           | -8.596 |
| 324 | Folitenol                                                                            | -8.585 |
| 323 | Phaseollin                                                                           | -8.547 |
| 346 | Erypoegin E                                                                          | -8.526 |
| 276 | 8-Prenylerythrinin C (Isosenegalensein) (Euchrenone b10)                             | -8.518 |
| 274 | Erythrinin C                                                                         | -8.517 |
| 375 | Kanzonol U (Glabrocoumarone A)                                                       | -8.504 |
| 315 | Erylysin B                                                                           | -8.501 |
| 311 | Erybraedin E                                                                         | -8.484 |
| 270 | Erysenegalensein O                                                                   | -8.477 |
| 266 | Erysenegalensein K                                                                   | -8.468 |
| 277 | Vogelin H                                                                            | -8.43  |
| 272 | Erypoegin K                                                                          | -8.425 |
| 265 | Erysenegalensein G                                                                   | -8.417 |
| 300 | Erythribyssin C                                                                      | -8.411 |
| 81  | Abyssinoflavanone II (Abyssinin II)                                                  | -8.4   |
| 284 | 2,3-Dehydrokievitone                                                                 | -8.383 |
| 31  | Abyssinone II                                                                        | -8.36  |
| 71  | Erysenegalone (Erythrisenegalone)                                                    | -8.36  |
| 293 | Erythrabyssin II                                                                     | -8.36  |
| 280 | Erythraddison I                                                                      | -8.357 |
| 310 | Erybraedin D                                                                         | -8.35  |
| 298 | Eryvarin K                                                                           | -8.347 |
| 290 | Sophorapterocarpan A (Homoedudiol)                                                   | -8.328 |
| 335 | Eryzerin E                                                                           | -8.314 |
| 321 | Isoneorautenol                                                                       | -8.283 |
| 307 | Erybraedin A                                                                         | -8.281 |
| 292 | 1-Methoxy phaseollidin                                                               | -8.279 |
| 322 | 8-Methoxyneorautenol                                                                 | -8.275 |
| 125 | Abyssinone D                                                                         | -8.27  |
| 330 | Fuscacarpan A                                                                        | -8.269 |
| 318 | Orientanol B                                                                         | -8.265 |
| 273 | Senegalensin                                                                         | -8.241 |
| 373 | Addisofuran A                                                                        | -8.238 |
| 331 | Cristacarpin (Erythrabissin I)                                                       | -8.203 |
| 374 | Addisofuran B                                                                        | -8.209 |
| 317 | Shinpterocarpin                                                                      | -8.191 |

|     |                                                                                                   |        |
|-----|---------------------------------------------------------------------------------------------------|--------|
| 29  | 7-Hydroxy-4'-methoxy-3'-(3- hydroxy-3-methyl-trans-but-1- enyl)-5'-(3-methylbut-2-enyl) flavanone | -8.18  |
| 295 | Calopocarpin                                                                                      | -8.168 |
| 121 | 5-Prenylbutein                                                                                    | -8.15  |
| 342 | Eryvarin A                                                                                        | -8.149 |
| 362 | 2-(5'-Hydroxy-3''-methoxyphenyl)- 6-hydroxy-5-methoxybenzofuran                                   | -8.136 |
| 101 | Addisoniaflavanone II                                                                             | -8.13  |
| 263 | Isoerysenegalensein E (Lysisteisoflavone)                                                         | -8.124 |
| 297 | Eryvarin J                                                                                        | -8.12  |
| 309 | Erybraedin C                                                                                      | -8.115 |
| 369 | Burttinol D                                                                                       | -8.099 |
| 187 | Erypoegin G                                                                                       | -8.08  |
| 353 | 4-Hydroxycoumasterol                                                                              | -8.059 |
| 352 | Coumasterol                                                                                       | -8.044 |
| 356 | Erythribyssin N                                                                                   | -8.043 |
| 299 | Erythribyssin B                                                                                   | -8.04  |
| 271 | 5,7,4'-Trihydroxy-6-(2''-hydroxy3''-methylbut-3''enyl) isoflavone                                 | -8.038 |
| 296 | 3,9-Dihydroxy-4-prenylpterocarpan                                                                 | -8.013 |
| 285 | 8-Prenylluteone                                                                                   | -8.012 |
| 372 | 2'-O-Demethylbidwillol B                                                                          | -8.008 |
| 340 | Orientanol A                                                                                      | -8.002 |
| 363 | Vignafuran                                                                                        | -7.968 |
| 291 | Phaseollidin                                                                                      | -7.965 |
| 303 | Erycristin                                                                                        | -7.937 |
| 162 | Eryvellutinone                                                                                    | -7.91  |
| 368 | Glyinflarin H                                                                                     | -7.887 |
| 316 | Erylsin C                                                                                         | -7.883 |
| 312 | Erybraedin F                                                                                      | -7.876 |
| 261 | Erysenegalensein D                                                                                | -7.873 |
| 103 | 5,7-Dihydroxy-3',4'-dimethoxy-5'- (3-methylbut-2-enyl)flavanone                                   | -7.86  |
| 212 | 3'-O-Methylorobol                                                                                 | -7.86  |
| 283 | 7-O-Methylluteone                                                                                 | -7.86  |
| 320 | Neorautenol                                                                                       | -7.858 |
| 364 | Eryvarin L                                                                                        | -7.843 |
| 367 | Eryvarin U                                                                                        | -7.831 |
| 348 | Eryvarin D                                                                                        | -7.825 |
| 231 | Schliebenone B                                                                                    | -7.81  |
| 328 | Erysubin C                                                                                        | -7.792 |
| 361 | Latissimbenzofuran                                                                                | -7.772 |
| 269 | Erysenegalensein N                                                                                | -7.766 |
| 289 | Demethylmedicarpin                                                                                | -7.754 |
| 197 | Calycosin                                                                                         | -7.74  |
| 343 | Erythribyssin A                                                                                   | -7.718 |
| 358 | Indicanine B                                                                                      | -7.713 |
| 338 | Erypoegin I                                                                                       | -7.693 |
| 370 | Erypoegin F                                                                                       | -7.687 |
| 357 | Indicanine A                                                                                      | -7.663 |
| 313 | Erystagallin C                                                                                    | -7.658 |
| 262 | Erysenegalensein E                                                                                | -7.656 |
| 165 | Eryvarin M                                                                                        | -7.65  |



|     |                                                                   |        |
|-----|-------------------------------------------------------------------|--------|
| 337 | Fuscacarpan C                                                     | -7.616 |
| 336 | Fuscacarpan B                                                     | -7.613 |
| 306 | Dolichins A and B                                                 | -7.588 |
| 365 | Eryvarin P                                                        | -7.554 |
| 301 | Medicarpin                                                        | -7.512 |
| 304 | 3-Hydroxy-10-(3-hydroxy-3- methylbutyl)-9- methoxypterocarpan     | -7.506 |
| 305 | 3-Hydroxy-10-(2,3-dihydroxy-3- methylbutyl)-9- methoxypterocarpan | -7.35  |
| 359 | Robustic acid                                                     | -7.312 |
| 377 | Eryvarin R                                                        | -7.275 |
| 281 | Panchovillin                                                      | -7.231 |
| 376 | Erythribyssin H                                                   | -7.225 |
| 282 | 7-Demethylrobustigenin                                            | -7.194 |
| 302 | Sandwicensin                                                      | -7.069 |
| 326 | Erythribyssin D                                                   | -6.785 |
| 329 | Erysubin D                                                        | -6.422 |
| 327 | Erythribyssin M                                                   | -5.337 |
| 235 | Indicanine D                                                      | -5.26  |
| 288 | Derriscanoside B                                                  | -5.075 |
| 378 | Bis-Sigmodiol                                                     | -1.257 |
